# Supplementary material for: Assessment of Balkan Pepper (Capsicum annuum L.) Accessions for Agronomic, Fruit Quality, and Pest Resistance Traits
Source: MDPI journal article supplement (doi:10.3390/horticulturae10040389), 2024-04-11

**Supplementary Information:****Table S1. Average temperature and rainfall recorded each month across growing season during 2018 and 2019**

| Month     | Temperature<br>(°C) |      | Rainfall<br>(Inch) |      |
|-----------|---------------------|------|--------------------|------|
|           | 2018                | 2019 | 2018               | 2019 |
| May       | 19.3                | 18.1 | 2.20               | 2.76 |
| June      | 22.9                | 23.3 | 5.43               | 6.30 |
| July      | 24.1                | 24.0 | 2.95               | 2.36 |
| August    | 24.9                | 25.4 | 0.79               | 0.24 |
| September | 19.8                | 19.7 | 0.55               | 0.79 |

**Table S2. Soil content details of the experimental field**

| <b>Parameter</b>                    | <b>Unit</b>         | <b>Measured Content</b> |
|-------------------------------------|---------------------|-------------------------|
| <b>pH</b>                           |                     | 6.7 - 6.9               |
| <b>Electrical Conductivity (EC)</b> | mS cm <sup>-1</sup> | 0.07 - 0.10             |
| <b>NO<sub>3</sub></b>               | mg dm <sup>3</sup>  | 5.0 - 25.0              |
| <b>P</b>                            | mg dm <sup>3</sup>  | 8.1 - 12.1              |
| <b>K</b>                            | mg dm <sup>3</sup>  | 16.6 - 38.2             |
| <b>Ca</b>                           | mg dm <sup>3</sup>  | 8.0 - 16.0              |
| <b>Mg</b>                           | mg dm <sup>3</sup>  | 7.2 - 9.6               |
| <b>Total Nitrogen</b>               | %                   | 0.08 - 0.10             |
| <b>Organic Matter (OM)</b>          | %                   | 4.3 - 5.0               |

Table S3. Evaluation of productivity and plant traits according to varietal type

| Descriptors                   | Plant height<br>(cm) | Stem height<br>(cm) | Branches<br>(number) | Productivity<br>(kg/plant) |
|-------------------------------|----------------------|---------------------|----------------------|----------------------------|
| <i>Corniforme</i>             |                      |                     |                      |                            |
| Max                           | 95.00                | 40.00               | 3.00                 | 0.67                       |
| Min                           | 55.00                | 15.00               | 2.00                 | 0.28                       |
| Average                       | 75.42                | 25.25               | 2.42                 | 0.50                       |
| SD                            | 13.39                | 7.56                | 0.51                 | 0.15                       |
| <i>Dolma (Blocky)</i>         |                      |                     |                      |                            |
| Max                           | 105.00               | 40.00               | 4.00                 | 1.24                       |
| Min                           | 45.00                | 15.00               | 2.00                 | 0.27                       |
| Average                       | 80.17                | 22.58               | 2.80                 | 0.58                       |
| SD                            | 15.07                | 6.14                | 0.51                 | 0.25                       |
| <i>Ratund (Pumpkin Shape)</i> |                      |                     |                      |                            |
| Max                           | 110.00               | 40.00               | 4.00                 | 1.04                       |
| Min                           | 45.00                | 10.00               | 2.00                 | 0.34                       |
| Average                       | 76.15                | 21.82               | 2.76                 | 0.60                       |
| SD                            | 12.72                | 5.43                | 0.54                 | 0.17                       |
| <i>Kapia</i>                  |                      |                     |                      |                            |
| Max                           | 110.00               | 40.00               | 4.00                 | 1.22                       |
| Min                           | 45.00                | 10.00               | 2.00                 | 0.24                       |
| Average                       | 71.90                | 25.06               | 2.79                 | 0.59                       |
| SD                            | 14.33                | 5.78                | 0.47                 | 0.19                       |
| <i>All</i>                    |                      |                     |                      |                            |
| Max                           | 110.00               | 40.00               | 4.00                 | 1.24                       |
| Min                           | 45.00                | 10.00               | 2.00                 | 0.24                       |
| Average                       | 75.65                | 23.25               | 2.76                 | 0.59                       |
| SD                            | 14.44                | 5.98                | 0.51                 | 0.20                       |

Table S4. Evaluation of fruit traits according to varietal type

| Descriptors                   | Length<br>(cm) | Width<br>(cm) | Wall<br>thickness<br>(mm) | Locules<br>(number) | Weight<br>(g) | Edible part<br>(%) |
|-------------------------------|----------------|---------------|---------------------------|---------------------|---------------|--------------------|
| <i>Corniforme</i>             |                |               |                           |                     |               |                    |
| Max                           | 27.50          | 2.50          | 2.98                      | 3.00                | 42.90         | 90.38              |
| Min                           | 18.00          | 1.70          | 1.48                      | 2.00                | 15.50         | 67.01              |
| Average                       | 22.67          | 2.12          | 2.09                      | 2.17                | 29.29         | 84.98              |
| SD                            | 2.72           | 0.29          | 0.46                      | 0.39                | 8.47          | 6.11               |
| <i>Dolma (Blocky)</i>         |                |               |                           |                     |               |                    |
| Max                           | 9.70           | 7.60          | 6.14                      | 5.00                | 139.90        | 92.21              |
| Min                           | 4.50           | 4.10          | 2.33                      | 2.00                | 24.20         | 71.59              |
| Average                       | 7.41           | 6.23          | 3.76                      | 3.35                | 83.60         | 85.34              |
| SD                            | 0.97           | 0.74          | 0.88                      | 0.58                | 21.84         | 4.13               |
| <i>Ratund (Pumpkin Shape)</i> |                |               |                           |                     |               |                    |
| Max                           | 6.40           | 10.40         | 8.14                      | 4.00                | 245.00        | 93.86              |
| Min                           | 2.00           | 5.60          | 2.67                      | 2.00                | 53.50         | 69.36              |
| Average                       | 3.91           | 7.62          | 5.69                      | 3.07                | 124.13        | 86.74              |
| SD                            | 1.00           | 1.02          | 1.09                      | 0.53                | 36.67         | 4.57               |
| <i>Kapia</i>                  |                |               |                           |                     |               |                    |
| Max                           | 21.20          | 8.60          | 6.56                      | 4.00                | 217.90        | 93.45              |
| Min                           | 9.10           | 4.00          | 1.59                      | 2.00                | 56.20         | 71.69              |
| Average                       | 13.58          | 6.12          | 4.30                      | 2.49                | 123.16        | 87.65              |
| SD                            | 2.02           | 1.19          | 1.04                      | 0.55                | 37.70         | 3.58               |
| <i>All</i>                    |                |               |                           |                     |               |                    |
| Max                           | 27.50          | 10.40         | 8.14                      | 5.00                | 245.00        | 93.86              |
| Min                           | 2.00           | 1.70          | 1.48                      | 2.00                | 15.50         | 67.01              |
| Average                       | 8.86           | 6.53          | 4.60                      | 2.90                | 109.64        | 86.63              |
| SD                            | 5.36           | 1.57          | 1.40                      | 0.66                | 41.31         | 4.32               |

Table S5. Evaluation of biochemical traits according to varietal type

| Descriptors                   | Dry matter<br>(%) | TSS<br>(Brix) | Antioxidant activity<br>( $\mu\text{mol Fe}^{2+}/\text{g FW}$ ) | TP<br>(mg GAE/100 g FW) |
|-------------------------------|-------------------|---------------|-----------------------------------------------------------------|-------------------------|
| <i>Corniforme</i>             |                   |               |                                                                 |                         |
| Max                           | 9.77              | 5.40          | 6.46                                                            | 105.87                  |
| Min                           | 8.15              | 3.90          | 2.92                                                            | 46.43                   |
| Average                       | 8.93              | 4.90          | 4.37                                                            | 79.01                   |
| SD                            | 0.53              | 0.55          | 1.34                                                            | 25.92                   |
| <i>Dolma (Blocky)</i>         |                   |               |                                                                 |                         |
| Max                           | 8.89              | 5.60          | 4.37                                                            | 92.90                   |
| Min                           | 5.96              | 3.60          | 1.41                                                            | 40.98                   |
| Average                       | 7.15              | 4.40          | 2.88                                                            | 62.64                   |
| SD                            | 0.65              | 0.47          | 0.76                                                            | 15.72                   |
| <i>Ratund (Pumpkin Shape)</i> |                   |               |                                                                 |                         |
| Max                           | 12.34             | 10.50         | 18.69                                                           | 257.61                  |
| Min                           | 8.68              | 6.30          | 2.70                                                            | 73.49                   |
| Average                       | 10.09             | 7.82          | 9.59                                                            | 164.27                  |
| SD                            | 0.81              | 0.86          | 3.95                                                            | 44.73                   |
| <i>Kapia</i>                  |                   |               |                                                                 |                         |
| Max                           | 12.55             | 10.20         | 12.72                                                           | 196,76                  |
| Min                           | 8.86              | 7.40          | 4.98                                                            | 27.58                   |
| Average                       | 10.68             | 8.63          | 7.75                                                            | 133,72                  |
| SD                            | 0.86              | 0.68          | 2.05                                                            | 85,24                   |
| <i>All</i>                    |                   |               |                                                                 |                         |
| Max                           | 12.55             | 10.50         | 18.69                                                           | 257.61                  |
| Min                           | 5.96              | 3.60          | 1.41                                                            | 40.98                   |
| Average                       | 9.53              | 7.13          | 7.13                                                            | 125.83                  |
| SD                            | 1.59              | 1.86          | 3.82                                                            | 52.32                   |

Table S6. Evaluation of insect pest infestation according to a varietal type

| Descriptors                   | Pests              |                       |                    |                       |                    |                    |
|-------------------------------|--------------------|-----------------------|--------------------|-----------------------|--------------------|--------------------|
|                               | Green peach aphid  |                       | Thrips             |                       | Cotton bollworm    |                    |
|                               | Damaged plants (%) | Degree of infestation | Damaged plants (%) | Degree of infestation | Damaged plants (%) | Damaged fruits (%) |
| <i>Corniforme</i>             |                    |                       |                    |                       |                    |                    |
| Max                           | 0.00               | 0.00                  | 55.00              | 2.00                  | 6.90               | 10.00              |
| Min                           | 0.00               | 0.00                  | 6.90               | 0.83                  | 5.00               | 3.33               |
| Average                       | 0.00               | 0.00                  | 30.95              | 1.42                  | 5.95               | 6.67               |
| SD                            | 0.00               | 0.00                  | 34.01              | 0.83                  | 1.34               | 4.72               |
| <i>Dolma (Blocky)</i>         |                    |                       |                    |                       |                    |                    |
| Max                           | 16.00              | 1.00                  | 56.67              | 2.00                  | 31.25              | 23.33              |
| Min                           | 0.00               | 0.00                  | 8.00               | 0.83                  | 6.67               | 0.00               |
| Average                       | 3.51               | 0.33                  | 33.77              | 1.17                  | 14.89              | 11.67              |
| SD                            | 5.04               | 0.47                  | 22.25              | 0.36                  | 7.12               | 7.07               |
| <i>Ratund (Pumpkin Shape)</i> |                    |                       |                    |                       |                    |                    |
| Max                           | 5.00               | 0.33                  | 61.67              | 1.33                  | 18.18              | 60.00              |
| Min                           | 0.00               | 0.00                  | 10.53              | 0.83                  | 0.00               | 0.00               |
| Average                       | 0.83               | 0.04                  | 36.82              | 1.03                  | 9.75               | 12.92              |
| SD                            | 1.72               | 0.10                  | 20.11              | 0.11                  | 4.54               | 13.87              |
| <i>Kapia</i>                  |                    |                       |                    |                       |                    |                    |
| Max                           | 6.67               | 1.00                  | 65.00              | 2.00                  | 20.00              | 13.33              |
| Min                           | 0.00               | 0.00                  | 9.68               | 0.50                  | 6.45               | 0.00               |
| Average                       | 1.95               | 0.23                  | 30.06              | 1.20                  | 10.01              | 8.21               |
| SD                            | 2.38               | 0.35                  | 18.62              | 0.49                  | 4.42               | 4.21               |

**Figure S1. PCA variance plot depicting variance contributed by each principal component.** Blue line depicts the cumulative variance whereas red line discerns variance contributed by each principal component.

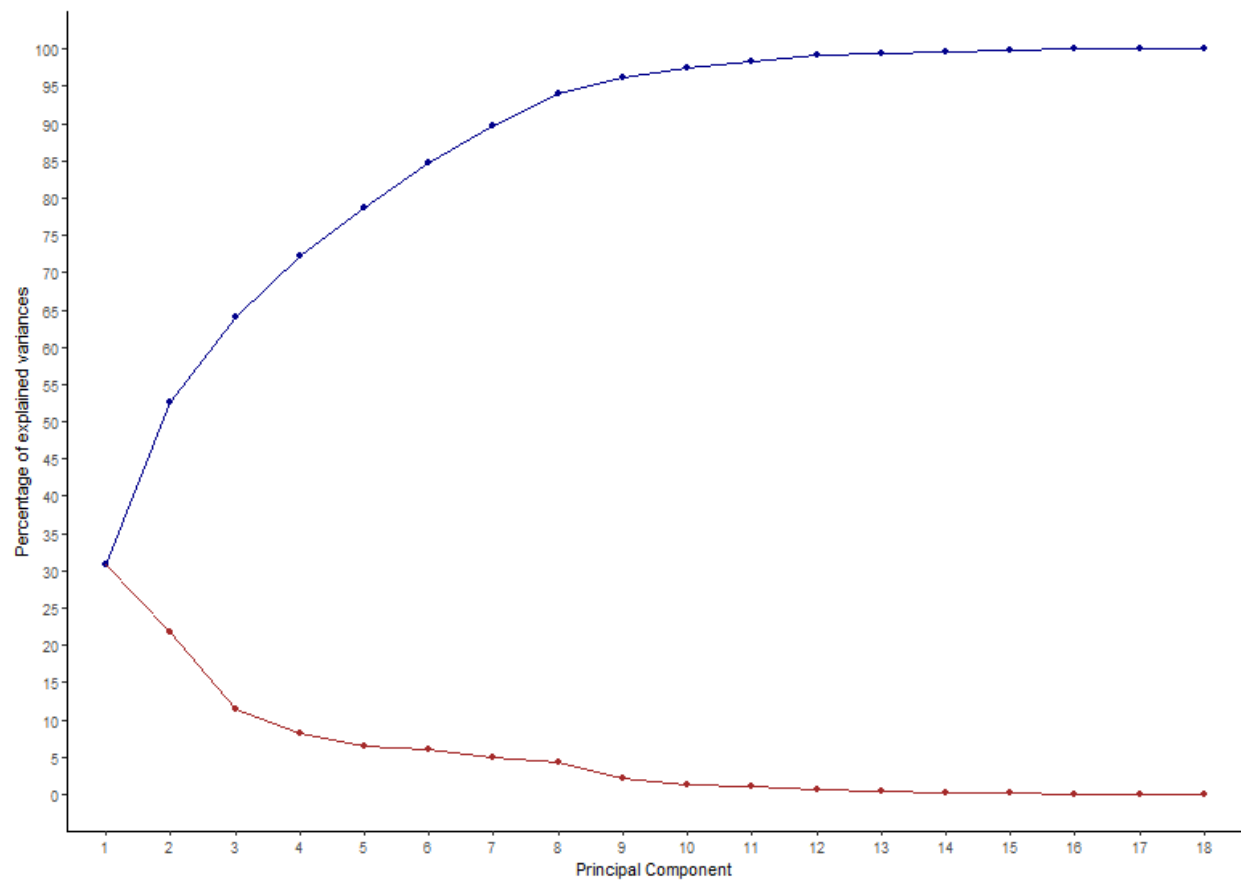

Supplement: s1 [file s1]
